# Supplementary material for: Effect of maternal smoking in pregnancy and childhood on child and adolescent sleep outcomes to 21 years: a birth cohort study
Source: PubMed Central journal article supplement (PMC6402153; doi:10.1186/s12887-019-1439-1), 2019-03-06
Supplement: 12887_2019_1439_MOESM2_ESM.pdf [file 12887_2019_1439_MOESM2_ESM.pdf]

MUSP OBSTETRIC DATA SHEET - A

PHASE:

NAME: \_\_\_\_\_

CODE NO: \_\_\_\_\_

U.R. NO:

PAST OBSTETRIC HISTORY:

1. (AN) Total No. of previous pregnancies

|     | <u>Yr</u>                                 | <u>Gest'n</u>                             | <u>Bth Wt (gms)</u>                                                                 | <u>Sex</u>           | <u>Delivery</u>      | <u>Outcome</u>       |
|-----|-------------------------------------------|-------------------------------------------|-------------------------------------------------------------------------------------|----------------------|----------------------|----------------------|
| 2.  | <input type="text"/> <input type="text"/> | <input type="text"/> <input type="text"/> | <input type="text"/> <input type="text"/> <input type="text"/> <input type="text"/> | <input type="text"/> | <input type="text"/> | <input type="text"/> |
| 3.  | <input type="text"/> <input type="text"/> | <input type="text"/> <input type="text"/> | <input type="text"/> <input type="text"/> <input type="text"/> <input type="text"/> | <input type="text"/> | <input type="text"/> | <input type="text"/> |
| 4.  | <input type="text"/> <input type="text"/> | <input type="text"/> <input type="text"/> | <input type="text"/> <input type="text"/> <input type="text"/> <input type="text"/> | <input type="text"/> | <input type="text"/> | <input type="text"/> |
| 5.  | <input type="text"/> <input type="text"/> | <input type="text"/> <input type="text"/> | <input type="text"/> <input type="text"/> <input type="text"/> <input type="text"/> | <input type="text"/> | <input type="text"/> | <input type="text"/> |
| 6.  | <input type="text"/> <input type="text"/> | <input type="text"/> <input type="text"/> | <input type="text"/> <input type="text"/> <input type="text"/> <input type="text"/> | <input type="text"/> | <input type="text"/> | <input type="text"/> |
| 7.  | <input type="text"/> <input type="text"/> | <input type="text"/> <input type="text"/> | <input type="text"/> <input type="text"/> <input type="text"/> <input type="text"/> | <input type="text"/> | <input type="text"/> | <input type="text"/> |
| 8.  | <input type="text"/> <input type="text"/> | <input type="text"/> <input type="text"/> | <input type="text"/> <input type="text"/> <input type="text"/> <input type="text"/> | <input type="text"/> | <input type="text"/> | <input type="text"/> |
| 9.  | <input type="text"/> <input type="text"/> | <input type="text"/> <input type="text"/> | <input type="text"/> <input type="text"/> <input type="text"/> <input type="text"/> | <input type="text"/> | <input type="text"/> | <input type="text"/> |
| 10. | <input type="text"/> <input type="text"/> | <input type="text"/> <input type="text"/> | <input type="text"/> <input type="text"/> <input type="text"/> <input type="text"/> | <input type="text"/> | <input type="text"/> | <input type="text"/> |
| 11. | <input type="text"/> <input type="text"/> | <input type="text"/> <input type="text"/> | <input type="text"/> <input type="text"/> <input type="text"/> <input type="text"/> | <input type="text"/> | <input type="text"/> | <input type="text"/> |

CODE

SEX

1. Male
2. Female
3. Male - Twin
4. Female - Twin

DELIVERY

1. Normal
2. Forceps
3. Breech
4. Caesarean section

OUTCOME

1. Live (at present)
2. Miscarriage
3. T.O.P.
4. Ectopic
5. S.B.
6. N.N.D.
7. Death (1 mth-1 yr)
8. Death(1 yr )
9. Adoption,Fostered

Present Pregnancy

|    |      |                                                |                      |                      |                      |                      |                      |                      |                      |
|----|------|------------------------------------------------|----------------------|----------------------|----------------------|----------------------|----------------------|----------------------|----------------------|
| 12 | (AN) | Height (to nearest cms)                        | <input type="text"/> | <input type="text"/> | <input type="text"/> |                      |                      |                      |                      |
| 13 |      | Height - patients estimate (cms)               | <input type="text"/> | <input type="text"/> | <input type="text"/> |                      |                      |                      |                      |
| 14 | (AN) | Pre-pregnant weight (to nearest tags)          | <input type="text"/> | <input type="text"/> | <input type="text"/> |                      |                      |                      |                      |
| 15 |      | Pre-pregnant weight - patients estimate (kgs)  | <input type="text"/> | <input type="text"/> | <input type="text"/> |                      |                      |                      |                      |
| 16 |      | Height of baby's father (cms)                  | <input type="text"/> | <input type="text"/> | <input type="text"/> |                      |                      |                      |                      |
| 17 |      | Weight of baby's father (kgs)                  | <input type="text"/> | <input type="text"/> | <input type="text"/> |                      |                      |                      |                      |
| 18 | (AN) | Date of 1st Antenatal visit                    | <input type="text"/> | <input type="text"/> | <input type="text"/> | <input type="text"/> | <input type="text"/> | <input type="text"/> | <input type="text"/> |
| 19 |      | Gestation at 1st Antenatal visit               | <input type="text"/> | <input type="text"/> |                      |                      |                      |                      |                      |
| 20 | (AN) | Weight at 1st visit (to nearest kg)            | <input type="text"/> | <input type="text"/> | <input type="text"/> |                      |                      |                      |                      |
| 21 | (AN) | Date of maximum recorded weight                | <input type="text"/> | <input type="text"/> | <input type="text"/> | <input type="text"/> | <input type="text"/> | <input type="text"/> | <input type="text"/> |
| 22 |      | Gestation at maximum recorded weight           | <input type="text"/> | <input type="text"/> |                      |                      |                      |                      |                      |
| 23 | (AN) | Maximum recorded weight (to nearest kg)        | <input type="text"/> | <input type="text"/> | <input type="text"/> |                      |                      |                      |                      |
| 24 | (AN) | Date of last Antenatal visit                   | <input type="text"/> | <input type="text"/> | <input type="text"/> | <input type="text"/> | <input type="text"/> | <input type="text"/> | <input type="text"/> |
| 25 |      | Gestation at last Antenatal visit              | <input type="text"/> | <input type="text"/> |                      |                      |                      |                      |                      |
| 26 | (AN) | Weight at last Antenatal visit (to nearest kg) | <input type="text"/> | <input type="text"/> | <input type="text"/> |                      |                      |                      |                      |
| 27 | (AN) | Lowest recorded haemoglobin (gms)              | <input type="text"/> | <input type="text"/> | <input type="text"/> |                      |                      |                      |                      |

Delivery

- 28 (HS) Hour of Delivery (to next o'clock)
- 12.01 a.m. -- 1.00 a.m. = 01  
1.01 a.m. - 2.00 a.m. = 02  
11.01 p.m. -12.00 midnight = 24
- 29 (HS) Duration of Labour
- 1st Stage (to nearest hour)
- 2nd Stage (in minutes)
- 30 (AD2) Insurance
- 31 (AD5) Date of birth of mother (month and year)
- 32 (AD6) Suburb/Local Authority Code
- 33 (AD7) H.M.O.
- 34 (AD47) Placental Weight (gms)
- 35 (AD51) Method of Induction
- 36 (AD52) Augmentation of Labour
- 37 (AD54) Number of Infants Delivered
- 38 (AD56) Anaesthesia (N<sub>2</sub>O excluded)
- 39 (AD57) Fetal Distress
- 40 (AD60) Intravenous Infusion
- 41 (AD70) Date of Discharge after Delivery
- 42 (AD71) Number of Antenatal Admissions

|    |         |                                    |                      |                      |                      |                      |                      |                      |  |
|----|---------|------------------------------------|----------------------|----------------------|----------------------|----------------------|----------------------|----------------------|--|
| 43 | (ND1)   | Date of Delivery                   | <input type="text"/> | <input type="text"/> | <input type="text"/> | <input type="text"/> | <input type="text"/> | <input type="text"/> |  |
| 44 | (ND2)   | Birth Weight (gms)                 | <input type="text"/> | <input type="text"/> | <input type="text"/> | <input type="text"/> |                      |                      |  |
| 45 | (ND3)   | Sex                                |                      |                      |                      |                      |                      | <input type="text"/> |  |
| 46 | (ND4)   | Baby in Multiple Pregnancy         |                      |                      |                      |                      |                      | <input type="text"/> |  |
| 47 | (ND5)   | Presentation at Delivery           |                      |                      |                      |                      |                      | <input type="text"/> |  |
| 48 | (ND6)   | Method of. Delivery                | <input type="text"/> |                      | <input type="text"/> |                      |                      |                      |  |
| 49 | (ND7)   | Apgar at 1 minute                  |                      |                      |                      |                      |                      | <input type="text"/> |  |
| 50 | (ND8)   | Apgar at 5 minutes                 |                      |                      |                      |                      |                      | <input type="text"/> |  |
| 51 | (ND9)   | Time to establish respiration      |                      |                      |                      |                      |                      | <input type="text"/> |  |
| 52 | (ND10a) | Resuscitation given – mechanical   |                      |                      |                      |                      |                      | <input type="text"/> |  |
| 53 | (ND10b) | Resuscitation given – drug         |                      |                      |                      |                      |                      | <input type="text"/> |  |
| 54 | (ND11)  | Length of baby (crown - heel)      |                      |                      |                      |                      |                      | <input type="text"/> |  |
| 55 | (ND15)  | Head Circumference (cms)           |                      |                      |                      |                      |                      | <input type="text"/> |  |
| 56 | (ND16)  | Jaundice                           |                      |                      |                      |                      |                      | <input type="text"/> |  |
| 57 | (ND17)  | Highest Bilirubin                  |                      |                      |                      |                      |                      | <input type="text"/> |  |
| 58 | (ND20)  | Congenital Malformation            | <input type="text"/> | <input type="text"/> | <input type="text"/> | <input type="text"/> |                      |                      |  |
| 59 | (ND24)  | Date of Discharge or Death of Baby | <input type="text"/> | <input type="text"/> | <input type="text"/> | <input type="text"/> | <input type="text"/> | <input type="text"/> |  |
| 60 | (ND26)  | Infants Survival in Hospital       |                      |                      |                      |                      |                      | <input type="text"/> |  |
| 61 | (ND27)  | Disposal                           |                      |                      |                      |                      |                      | <input type="text"/> |  |

OBSTETRIC DATA SHEET – B

PHASE: 

|   |
|---|
| 5 |
|---|

NAME: \_\_\_\_\_

CODE NO: \_\_\_\_\_

U.R. NO: 

|  |  |  |  |  |  |  |  |  |
|--|--|--|--|--|--|--|--|--|
|  |  |  |  |  |  |  |  |  |
|--|--|--|--|--|--|--|--|--|

1 Coded by

2 Gestation at Delivery 

|  |  |
|--|--|
|  |  |
|--|--|

3 Dates - Not certain ..... 1  
           Certain ..... 2

4 Date of 1st Contact with Mater Mothers' Hospital 

|  |  |  |  |  |  |  |  |  |
|--|--|--|--|--|--|--|--|--|
|  |  |  |  |  |  |  |  |  |
|--|--|--|--|--|--|--|--|--|

5. Booking - Apparent Date of 1st Visit Anywhere   
    Gestation - 20 weeks or less ..... 1  
    Gestation - 21 - 30 weeks ..... 2  
    Gestation - 31 weeks or more ..... 3  
    Unbooked ..... 4  
    Not known ..... 9

6. Attendance - Antenatal Care Anywhere   
    Regular ..... 1  
    Irregular (< 50% of scheduled A/N visits) ..... 2  
    Nil ..... 3  
    Not applicable ..... 4  
    Not known ..... 9

7. Information re Booking/Attendance   
    Not certain ..... 1  
    Certain ..... 2

8. Antenatal Admissions   
    No. of antenatal admissions - < 3 days   
                                                  3 - 7 days   
                                                  > 7 days

|     |                                                                                              |                              |                      |                      |
|-----|----------------------------------------------------------------------------------------------|------------------------------|----------------------|----------------------|
| 9.  | Complications this pregnancy                                                                 | Gestation<br>(1st diagnosed) |                      | Severity             |
|     | (a) Essential Hypertension                                                                   | <input type="text"/>         | <input type="text"/> | <input type="text"/> |
|     | (b) Pre-eclampsia                                                                            | <input type="text"/>         | <input type="text"/> | <input type="text"/> |
|     | (c) Bleeding - abruption placenta                                                            | <input type="text"/>         | <input type="text"/> | <input type="text"/> |
|     | - antepartum haemorrhage                                                                     | <input type="text"/>         | <input type="text"/> | <input type="text"/> |
|     | - placenta praevia                                                                           | <input type="text"/>         | <input type="text"/> | <input type="text"/> |
|     | - unclassified                                                                               | <input type="text"/>         | <input type="text"/> | <input type="text"/> |
| 10. | Diseases significant to pregnancy                                                            | Disease                      |                      | Severity             |
|     | (a) Pre-existing – specify _____<br>_____                                                    | <input type="text"/>         | <input type="text"/> | <input type="text"/> |
|     | (b) Newly developed – specify _____<br>_____                                                 | <input type="text"/>         | <input type="text"/> | <input type="text"/> |
| 11  | Number of admissions to Labour Ward at <37 completed weeks of pregnancy for premature labour |                              |                      | <input type="text"/> |
| 12. | Analgesics                                                                                   | No. of Doses                 |                      |                      |
|     | Haloperidol, droperidol                                                                      | <input type="text"/>         |                      |                      |
|     | Morphine                                                                                     | <input type="text"/>         |                      |                      |
|     | Omnopon                                                                                      | <input type="text"/>         |                      |                      |
|     | Pethidine                                                                                    | <input type="text"/>         |                      |                      |
|     | Stemetil                                                                                     | <input type="text"/>         |                      |                      |
|     | Valium                                                                                       | <input type="text"/>         |                      |                      |
|     | Others e.g. largactil, sparine etc.                                                          | <input type="text"/>         |                      |                      |
| 13. | Fetal distress                                                                               | <u>No</u>                    | <u>Yes</u>           |                      |
|     | As indication for operative delivery                                                         | 1                            | 2                    | <input type="text"/> |
|     | Meconium                                                                                     | 1                            | 2                    | <input type="text"/> |
|     | Fetal Heart Monitoring                                                                       | 1                            | 2                    | <input type="text"/> |
| 14. | Syntocinon                                                                                   |                              |                      |                      |
|     | Total time (to nearest hour)                                                                 | <input type="text"/>         |                      |                      |
|     | Highest concentration - units                                                                | <input type="text"/>         |                      |                      |
|     | - drops                                                                                      | <input type="text"/>         |                      |                      |

15. Outcome at Delivery
- Alive..... 1
  - Dead (antepartum macerated) ..... 2
  - (antepartum fresh) ..... 3
  - (antepartum unknown) ..... 4
  - (intrapartum) ..... 5
  - (immediate postpartum  
i.e. < 1hour) ..... 6

16. No. of days in Intensive Care Nursery

| 17. Significant Neonatal Problems          | <u>No</u> | <u>Yes</u> |                          |
|--------------------------------------------|-----------|------------|--------------------------|
| (a) Observation only (no other reason)     | 1         | 2          | <input type="checkbox"/> |
| (b) Prematurity                            | 1         | 2          | <input type="checkbox"/> |
| (c) Small for gestational age              | 1         | 2          | <input type="checkbox"/> |
| (d) Respiratory problems                   | 1         | 2          | <input type="checkbox"/> |
| (e) Central Nervous System Problems        | 1         | 2          | <input type="checkbox"/> |
| (f) Blood Coagulation problems             | 1         | 2          | <input type="checkbox"/> |
| (g) Feeding problems                       | 1         | 2          | <input type="checkbox"/> |
| (h) Trauma                                 | 1         | 2          | <input type="checkbox"/> |
| (i) Jaundice                               | 1         | 2          | <input type="checkbox"/> |
| (j) Metabolic problems                     | 1         | 2          | <input type="checkbox"/> |
| (k) Congenital Abnormality                 | 1         | 2          | <input type="checkbox"/> |
| (l) Infection                              | 1         | 2          | <input type="checkbox"/> |
| (m) Cardiac                                | 1         | 2          | <input type="checkbox"/> |
| (n) Others - please specify _____<br>_____ | 1         | 2          | <input type="checkbox"/> |

18. Outcome
- Alive ..... 1
  - Alive with obvious residual handicap ..... 2
  - Dead ..... 3

19. Age at Death

No. of days (<24 hours = 01)
