# Supplementary material for: Effect of maternal smoking in pregnancy and childhood on child and adolescent sleep outcomes to 21 years: a birth cohort study
Source: PubMed Central journal article supplement (PMC6402153; doi:10.1186/s12887-019-1439-1), 2019-03-06
Supplement: 12887_2019_1439_MOESM9_ESM.pdf [file 12887_2019_1439_MOESM9_ESM.pdf]

## Code book

### At first-antenatal visit

Ragem variable level "age mother at fcv"

Value level

- 1 "13-19"
- 2 "20-35"
- 3 "35+"

Ra90 variable level "recorded income at phase A"

Value level

- 1 "\$10400 or more"
- 2 "\$10399 or less"

Ra80 variable level " Maternal education at FCV"

Value level

- 1 " incomplete high "
- 2 " complete high "
- 3 " post high "

Rbabwant variable level "pregnancy planned-wanted"

Value level

- 1 " plan-want"
- 2 " unsure "
- 3 "unplan-want"

a68 variable level "HOW MANY CIGARETTE DAILY: PRE-PREG"

Value label

- 1 " 50 OR MORE"
- 2 "30 - 49 PER DAY"
- 3 "20 - 29 PER DAY"
- 4 "10-19 PER DAY"
- 5 " 1-9 PER DAY"
- 6 "NONE"

a73 variable level "HOW MANY CIGARETTES DAILY: LAST WEEK"

Value label

- 1 " 50 OR MORE"
- 2 "30 - 49 PER DAY"
- 3 "20 - 29 PER DAY"
- 4 "10-19 PER DAY"
- 5 " 1-9 PER DAY"
- 6 "NONE"

a77 variable level " CUPS COFFEE DAILY: SINCE PREG"

value level

- 1 " 7 CUPS OR MORE"
- 2 "4-6 CUPS PER DAY"
- 3 "2-3 CUPS PER DAY"
- 4 " 1 CUP PER DAY"

5 "NONE"

a78 variable level " CUPS TEA DAILY: SINCE PREG"

value level

6 " 7 CUPS OR MORE"

7 "4-6 CUPS PER DAY"

8 "2-3 CUPS PER DAY"

9 " 1 CUP PER DAY"

10 "NONE"

ralc3 variable level "mat alcohol late"

value level

1 " nil"

2 ">0 - .5 per day "

3 ">.5 - 1 per day "

4 " >1 per day "

### **At birth**

b35 variable level " HOW MANY CIGARETTES DAILY - LAST 3 MTHS - PHB"

Value label

1 " 50 OR MORE"

2 "30 - 49 PER DAY"

3 "20 - 29 PER DAY"

4 "10-19 PER DAY"

5 " 1-9 PER DAY"

6 "NONE"

b38 variable level " CUPS COFFEE DAILY: SINCE PREG"

value level

11 " 7 CUPS OR MORE"

12 "4-6 CUPS PER DAY"

13 "2-3 CUPS PER DAY"

14 " 1 CUP PER DAY"

15 "NONE"

b39 variable level " CUPS TEA DAILY: SINCE PREG"

value level

16 " 7 CUPS OR MORE"

17 "4-6 CUPS PER DAY"

18 "2-3 CUPS PER DAY"

19 " 1 CUP PER DAY"

20 "NONE"

### **6-month**

e75 variable level " LAST WEEK HOW MANY CIGARETTES SMOKE PER DAY"

Value label

1 " 50 OR MORE"

2 "30 - 49 PER DAY"

3 "20 - 29 PER DAY"

4 "10-19 PER DAY"  
5 " 1-9 PER DAY"  
6 "NONE"

e2 variable level "sleeplessness"

Value level

1 "almost every day"  
2 " few times a week"  
3 "few times a month"  
4 " rarely"

E17 variable level "how long did you breast feed"

Value level

1 "still breast feeding "  
2 " 4-6 months "  
3 " 7 wks to 3 mths "  
4 " 3 wks to 6 wks "  
5 " 2 wks or less "  
6 " not at all "

### **5-years**

h93 variable level "IN LAST WEEK HOW MANY CIGARETTES PER DAY"

Value label

1 " 50 OR MORE"  
2 "30 - 49 PER DAY"  
3 "20 - 29 PER DAY"  
4 "10-19 PER DAY"  
5 " 1-9 PER DAY"  
6 "NONE"

g96 variable level "trouble sleeping"

Value level

1 "often"  
2 "sometimes"  
3 "never"

### **14-years**

*\*variable name with "k" reported by mothers and with "j" reported by child*

k196 variable level "CIGS PER DAY IN LAST WEEK"

Value label

1 " 50 OR MORE"  
2 "30 - 49 PER DAY"  
3 "20 - 29 PER DAY"  
4 "10-19 PER DAY"  
5 " 1-9 PER DAY"  
6 "NONE"

k47 variable level "nightmares"

Value level

1 "often"

2 "sometimes"  
 3 "never"  
 k54 variable level "overtired"  
 Value level  
 1 "often"  
 2 "sometimes"  
 3 "never"  
 k76 variable level "sleeps more than most kids day or  
 night"  
 Value level  
 1 "often"  
 2 "sometimes"  
 3 "never"  
 k91 variable level " talks or walks in sleep"  
 Value level  
 1 "often"  
 2 "sometimes"  
 3 "never"  
 k99 variable level "trouble sleeping"  
 Value level  
 1 "often"  
 2 "sometimes"  
 3 "never"  
 k150 variable level "child-snoring in last year"  
 Value level  
 1 "often"  
 2 "sometimes"  
 3 "never"  
 k75 variable level " sleeps less than most kids"  
 Value level  
 1 "often"  
 2 "sometimes"  
 3 "never"  
 j47 variable level "nightmares"  
 Value level  
 1 "often"  
 2 "sometimes"  
 3 "never"  
  
 j54 variable level "feel overtired"  
 Value level  
 1 "often"  
 2 "sometimes"  
 3 "never"  
 j76 variable level "sleep more than most kids"  
 Value level  
 1 "often"  
 2 "sometimes"  
 3 "never"  
 j91 variable level "talks or walks in sleep"  
 Value level

1 "often"  
2 "sometimes"  
3 "never"  
j99 variable level "trouble sleeping"  
Value level  
1 "often"  
2 "sometimes"  
3 "never"  
j75 variable level "sleep less than most kids"  
Value level  
1 "often"  
2 "sometimes"  
3 "never"

### **21-years**

m319 variable level "trouble sleeping"  
Value level  
1 "not true"  
2 "somewhat-sometimes true"  
3 "very-often true"  
m334 variable level "have nightmares"  
Value level  
1 "not true"  
2 "somewhat-sometimes true"  
3 "very-often true"  
m274 variable level "feel overtired"  
Value level  
1 "not true"  
2 "somewhat-sometimes true"  
3 "very-often true"  
m215 variable level "restlessness sleep"  
Value level  
1 "< once a week "  
2 "once to twice per week"  
3 "three+ per week"  
m213 variable level "waking during night"  
Value level  
1 "< once a week "  
2 "once to twice per week"  
3 "three+ per week"  
m216 variable level "daytime drowsiness"  
Value level  
1 "< once a week "  
2 "once to twice per week"  
3 "three+ per week"  
m219 variable level "trouble staying awake"  
Value level  
1 "no "  
2 "<once a week"  
3 "once or twice week"  
4 "three +per week"

m217      variable level      "sleep quality"

Value level

1    "very good"

2    "fairly good"

3    "fairly bad"

4    "very bad"

m214      variable level      " snoring"

Value level

1    "<once a week"

2    "once or twice week"

3    "three +per week"
