# Supplementary material for: Effect of maternal smoking in pregnancy and childhood on child and adolescent sleep outcomes to 21 years: a birth cohort study
Source: Springer Nature journal article supplement (doi:10.1186/s12887-019-1439-1), 2019-03-06
Supplement: MOESM5 [file 16529902]

MUSP Maternal 14 years

THE QUESTIONS BELOW REFER TO YOUR  
CHILD BORN AT THE MATER HOSPITAL ON  
...../...../.....

PHASE: 

|   |   |
|---|---|
| 6 | 2 |
|---|---|

CODE: \_\_\_\_\_

DATE: \_\_\_\_\_

WHICH BEST DESCRIBES YOUR CHILD IN THE LAST SIX MONTHS?

(Circle one number for each question 1-111)

|    |                                                         | <b>Often</b> | <b>Sometimes</b> | <b>Rarely/<br/>Never</b> |
|----|---------------------------------------------------------|--------------|------------------|--------------------------|
| 1  | Acts too young for his/her age                          | 1            | 2                | 3                        |
| 2  | Allergy                                                 | 1            | 2                | 3                        |
| 3  | Argues a lot                                            | 1            | 2                | 3                        |
| 4  | Asthma                                                  | 1            | 2                | 3                        |
| 5  | Behaves like opposite sex                               | 1            | 2                | 3                        |
| 6  | Bowel movements outside toilet                          | 1            | 2                | 3                        |
| 7  | Bragging, boasting                                      | 1            | 2                | 3                        |
| 8  | Can't concentrate, can't pay attention for long         | 1            | 2                | 3                        |
| 9  | Can't get his/her mind off certain thoughts; obsessions | 1            | 2                | 3                        |
| 10 | Can't sit still, restless, or hyperactive               | 1            | 2                | 3                        |
| 11 | Clings to adults or too dependent                       | 1            | 2                | 3                        |
| 12 | Complains of loneliness                                 | 1            | 2                | 3                        |
| 13 | Confused or seems to be in a fog                        | 1            | 2                | 3                        |

|    |                  |   |   |   |
|----|------------------|---|---|---|
| 14 | Cries a lot      | 1 | 2 | 3 |
| 15 | Cruel to animals | 1 | 2 | 3 |

*(Circle one number)*

|    |                                                                 | <b>Often</b> | <b>Sometimes</b> | <b>Rarely/<br/>Never</b> |
|----|-----------------------------------------------------------------|--------------|------------------|--------------------------|
| 16 | Cruelty, bullying, or meanness to others                        | 1            | 2                | 3                        |
| 17 | Day-dreams or gets lost in his/her thoughts                     | 1            | 2                | 3                        |
| 18 | Deliberately harms self or attempts suicide                     | 1            | 2                | 3                        |
| 19 | Demands a lot of attention                                      | 1            | 2                | 3                        |
| 20 | Destroys his/her own things                                     | 1            | 2                | 3                        |
| 21 | Destroys things belonging to his/her family or other children   | 1            | 2                | 3                        |
| 22 | Disobedient at home                                             | 1            | 2                | 3                        |
| 23 | Disobedient at school                                           | 1            | 2                | 3                        |
| 24 | Doesn't eat well                                                | 1            | 2                | 3                        |
| 25 | Doesn't get along with other children                           | 1            | 2                | 3                        |
| 26 | Doesn't seem to feel guilty after misbehaving                   | 1            | 2                | 3                        |
| 27 | Easily jealous                                                  | 1            | 2                | 3                        |
| 28 | Eats or drinks things that are not food - don't include sweets  | 1            | 2                | 3                        |
| 29 | Fears certain animals, situations, or places, other than school | 1            | 2                | 3                        |
| 30 | Fears going to school                                           | 1            | 2                | 3                        |
| 31 | Fears he/she might think or do something bad                    | 1            | 2                | 3                        |
| 32 | Feels he/she has to be perfect                                  | 1            | 2                | 3                        |

*(Circle one number)*

|    |                                               | <b>Often</b> | <b>Sometimes</b> | <b>Rarely/<br/>Never</b> |
|----|-----------------------------------------------|--------------|------------------|--------------------------|
| 33 | Feels or complains that no one loves him/her  | 1            | 2                | 3                        |
| 34 | Feels others are out to get him/her           | 1            | 2                | 3                        |
| 35 | Feels worthless or inferior                   | 1            | 2                | 3                        |
| 36 | Gets hurt a lot, accident prone               | 1            | 2                | 3                        |
| 37 | Gets in many fights                           | 1            | 2                | 3                        |
| 38 | Gets teased a lot                             | 1            | 2                | 3                        |
| 39 | Hangs around with children who get in trouble | 1            | 2                | 3                        |
| 40 | Hears sounds or voices that aren't there      | 1            | 2                | 3                        |
| 41 | Impulsive or acts without thinking            | 1            | 2                | 3                        |
| 42 | Likes to be alone                             | 1            | 2                | 3                        |
| 43 | Lying or cheating                             | 1            | 2                | 3                        |
| 44 | Bites fingernails                             | 1            | 2                | 3                        |
| 45 | Nervous, highstrung, or tense                 | 1            | 2                | 3                        |
| 46 | Nervous movements or twitching                | 1            | 2                | 3                        |
| 47 | Nightmares                                    | 1            | 2                | 3                        |
| 48 | Not liked by other children                   | 1            | 2                | 3                        |
| 49 | Constipated, doesn't move bowels              | 1            | 2                | 3                        |

*(Circle one number)*

|    |                                         | <b>Often</b> | <b>Sometimes</b> | <b>Rarely/<br/>Never</b> |
|----|-----------------------------------------|--------------|------------------|--------------------------|
| 50 | Too fearful or anxious                  | 1            | 2                | 3                        |
| 51 | Feels dizzy                             | 1            | 2                | 3                        |
| 52 | Feels too guilty                        | 1            | 2                | 3                        |
| 53 | Overeating                              | 1            | 2                | 3                        |
| 54 | Overtired                               | 1            | 2                | 3                        |
| 55 | Overweight                              | 1            | 2                | 3                        |
| 56 | Physically attacks people               | 1            | 2                | 3                        |
| 57 | Picks nose, skin or other parts of body | 1            | 2                | 3                        |
| 58 | Plays with own sex parts in public      | 1            | 2                | 3                        |
| 59 | Plays with own sex parts too much       | 1            | 2                | 3                        |
| 60 | Poor school work                        | 1            | 2                | 3                        |
| 61 | Poorly coordinated or clumsy            | 1            | 2                | 3                        |
| 62 | Prefers being with older kids           | 1            | 2                | 3                        |
| 63 | Prefers being with younger kids         | 1            | 2                | 3                        |
| 64 | Refuses to talk                         | 1            | 2                | 3                        |
| 65 | Repeats certain acts over and over      | 1            | 2                | 3                        |
| 66 | Runs away from home                     | 1            | 2                | 3                        |

*(Circle one number)*

|    |                                                    | <b>Often</b> | <b>Sometimes</b> | <b>Rarely/<br/>Never</b> |
|----|----------------------------------------------------|--------------|------------------|--------------------------|
| 67 | Screams a lot                                      | 1            | 2                | 3                        |
| 68 | Secretive, keeps things to self                    | 1            | 2                | 3                        |
| 69 | Sees things that aren't there                      | 1            | 2                | 3                        |
| 70 | Self-conscious or easily embarrassed               | 1            | 2                | 3                        |
| 71 | Sets fires                                         | 1            | 2                | 3                        |
| 72 | Sexual problems                                    | 1            | 2                | 3                        |
| 73 | Showing off or clowning                            | 1            | 2                | 3                        |
| 74 | Shy or timid                                       | 1            | 2                | 3                        |
| 75 | Sleeps less than most kids                         | 1            | 2                | 3                        |
| 76 | Sleeps more than most kids during day and/or night | 1            | 2                | 3                        |
| 77 | Smears or plays with bowel movements               | 1            | 2                | 3                        |
| 78 | Speech problem                                     | 1            | 2                | 3                        |
| 79 | Stares blankly                                     | 1            | 2                | 3                        |
| 80 | Steals at home                                     | 1            | 2                | 3                        |
| 81 | Steals outside home                                | 1            | 2                | 3                        |
| 82 | Stores up things he/she doesn't need               | 1            | 2                | 3                        |
| 83 | Strange behaviour                                  | 1            | 2                | 3                        |

*(Circle one number)*

|     |                                            | <b>Often</b> | <b>Sometimes</b> | <b>Rarely/<br/>Never</b> |
|-----|--------------------------------------------|--------------|------------------|--------------------------|
| 84  | Strange ideas                              | 1            | 2                | 3                        |
| 85  | Stubborn, sullen, or irritable             | 1            | 2                | 3                        |
| 86  | Sudden changes in mood or feelings         | 1            | 2                | 3                        |
| 87  | Sulks a lot                                | 1            | 2                | 3                        |
| 88  | Suspicious                                 | 1            | 2                | 3                        |
| 89  | Swearing or obscene language               | 1            | 2                | 3                        |
| 90  | Talks about killing self                   | 1            | 2                | 3                        |
| 91  | Talks or walks in sleep                    | 1            | 2                | 3                        |
| 92  | Talks too much                             | 1            | 2                | 3                        |
| 93  | Teases a lot                               | 1            | 2                | 3                        |
| 94  | Temper tantrums or hot temper              | 1            | 2                | 3                        |
| 95  | Thinks about sex too much                  | 1            | 2                | 3                        |
| 96  | Threatens people                           | 1            | 2                | 3                        |
| 97  | Thumb-sucking                              | 1            | 2                | 3                        |
| 98  | Too concerned with neatness or cleanliness | 1            | 2                | 3                        |
| 99  | Trouble sleeping                           | 1            | 2                | 3                        |
| 100 | Truancy, skips school                      | 1            | 2                | 3                        |

*(Circle one number)*

|     |                                               | <b>Often</b> | <b>Sometimes</b> | <b>Rarely/<br/>Never</b> |
|-----|-----------------------------------------------|--------------|------------------|--------------------------|
| 101 | Underactive, slow moving, or lacks energy     | 1            | 2                | 3                        |
| 102 | Unhappy, sad or depressed                     | 1            | 2                | 3                        |
| 103 | Unusually loud                                | 1            | 2                | 3                        |
| 104 | Uses alcohol or drugs for nonmedical purposes | 1            | 2                | 3                        |
| 105 | Vandalism                                     | 1            | 2                | 3                        |
| 106 | Wets self during the day                      | 1            | 2                | 3                        |
| 107 | Wets the bed                                  | 1            | 2                | 3                        |
| 108 | Whining                                       | 1            | 2                | 3                        |
| 109 | Wishes to be of the opposite sex              | 1            | 2                | 3                        |
| 110 | Withdrawn, doesn't get involved with others   | 1            | 2                | 3                        |
| 111 | Worries                                       | 1            | 2                | 3                        |



NOW WE HAVE SOME QUESTIONS ABOUT HOW YOU COMMUNICATE WITH YOUR CHILD .  
HOW WELL DO THE FOLLOWING STATEMENTS DESCRIBE WHAT HAPPENS IN YOUR HOME?

**(Please circle one number for each question 112-131)**

|     |                                                                                               | <b>Strongly<br/>Agree</b> | <b>Agree</b> | <b>Unsure</b> | <b>Disagree</b> | <b>Strongly<br/>Disagree</b> |
|-----|-----------------------------------------------------------------------------------------------|---------------------------|--------------|---------------|-----------------|------------------------------|
| 112 | I can discuss my beliefs with my child without feeling restrained or embarrassed.             | 1                         | 2            | 3             | 4               | 5                            |
| 113 | Sometimes I have trouble believing everything my child tells me.                              | 1                         | 2            | 3             | 4               | 5                            |
| 114 | My child is always a good listener.                                                           | 1                         | 2            | 3             | 4               | 5                            |
| 115 | I am sometimes afraid to ask my child for what I want.                                        | 1                         | 2            | 3             | 4               | 5                            |
| 116 | My child has a tendency to say things to me which would be better left unsaid.                | 1                         | 2            | 3             | 4               | 5                            |
| 117 | My child can tell how I'm feeling without asking.                                             | 1                         | 2            | 3             | 4               | 5                            |
| 118 | I am very satisfied with how my child and I talk together.                                    | 1                         | 2            | 3             | 4               | 5                            |
| 119 | If I were in trouble, I could tell my child.                                                  | 1                         | 2            | 3             | 4               | 5                            |
| 120 | I openly show affection to my child.                                                          | 1                         | 2            | 3             | 4               | 5                            |
| 121 | When we are having a problem, I often give my child the silent treatment.                     | 1                         | 2            | 3             | 4               | 5                            |
| 122 | I am careful about what I say to my child.                                                    | 1                         | 2            | 3             | 4               | 5                            |
| 123 | When talking with my child, I have a tendency to say things that would be better left unsaid. | 1                         | 2            | 3             | 4               | 5                            |

|     |                                                                        | <b>Strongly Agree</b> | <b>Agree</b> | <b>Unsure</b> | <b>Disagree</b> | <b>Strongly Disagree</b> |
|-----|------------------------------------------------------------------------|-----------------------|--------------|---------------|-----------------|--------------------------|
| 124 | When I ask questions, I get honest answers from my child.              | 1                     | 2            | 3             | 4               | 5                        |
| 125 | My child tries to understand my point of view.                         | 1                     | 2            | 3             | 4               | 5                        |
| 126 | There are topics I avoid discussing with my child.                     | 1                     | 2            | 3             | 4               | 5                        |
| 127 | I find it easy to discuss problems with my child.                      | 1                     | 2            | 3             | 4               | 5                        |
| 128 | It is very easy for me to express all my true feelings to my child.    | 1                     | 2            | 3             | 4               | 5                        |
| 129 | My child nags/bothers me                                               | 1                     | 2            | 3             | 4               | 5                        |
| 130 | My child insults me when he/she is angry with me.                      | 1                     | 2            | 3             | 4               | 5                        |
| 131 | I don't think I can tell my child how I really feel about some things. | 1                     | 2            | 3             | 4               | 5                        |

HOW OFTEN HAS YOUR CHILD HAD THE FOLLOWING IN THE **LAST SIX MONTHS?**

**(Circle one number for each question 132-138)**

|     |                                | <b>Often</b> | <b>Sometimes</b> | <b>Rarely/<br/>Never</b> |
|-----|--------------------------------|--------------|------------------|--------------------------|
| 132 | Aches or pains (not headaches) | 1            | 2                | 3                        |
| 133 | Headaches                      | 1            | 2                | 3                        |
| 134 | Nausea, feel sick              | 1            | 2                | 3                        |
| 135 | Problems with eyes             | 1            | 2                | 3                        |
| 136 | Rashes or other skin problems  | 1            | 2                | 3                        |
| 137 | Stomach aches or cramps        | 1            | 2                | 3                        |
| 138 | Vomiting, throwing up          | 1            | 2                | 3                        |

## HAS YOUR CHILD HAD ANY OF THE FOLLOWING?

(Circle one number; or each question 139-150)

|                                                                   | No | Yes |
|-------------------------------------------------------------------|----|-----|
| 139 Acne (pimples)                                                | 1  | 2   |
| 140 Asthma                                                        | 1  | 2   |
| 141 Epileptic fits                                                | 1  | 2   |
| 142 Diabetes                                                      | 1  | 2   |
| 143 Food allergies                                                | 1  | 2   |
| 144 A head injury with loss of consciousness                      | 1  | 2   |
| 145 Broken bones or fractures                                     | 1  | 2   |
| 146 Burns requiring hospitalization                               | 1  | 2   |
| 147 Poisoning requiring hospitalization                           | 1  | 2   |
| 148 In the <b>last year</b> , an accident needing a doctor's help | 1  | 2   |
| 149 In the <b>last year</b> , bedwetting                          | 1  | 2   |
| 150 In the <b>last year</b> , snoring                             | 1  | 2   |

151 In general, in the **last year**, do you think your child's health has been?

(Circle one number)

- Excellent..... 1  
 Good..... 2  
 Fair ..... 3  
 Poor ..... 4

152 How many times has your child been to a doctor in the last year?

\_\_\_\_\_ times (write 0 if never)

|  |  |
|--|--|
|  |  |
|--|--|

153 What is the total number of times your child has been admitted to hospital since birth?

\_\_\_\_\_ times (write 0 if never)

|  |  |
|--|--|
|  |  |
|--|--|

- 154 Does your child wear glasses or contact leases? **(Circle one number)**  
 No ..... 1  
 Yes, prescribed by doctor..... 2  
 Yes, but not prescribed by doctor..... 3
- 155 Does your child have a hearing problem? **(Circle one number)**  
 No ..... 1  
 Yes, mild ..... 2  
 Yes, uses a hearing aid ..... 3
- 156 Has your child got holes and/or fillings in his/her teeth?  
**(Circle one number)**  
 No ..... 1  
 Yes, a few ..... 2  
 Yes, a lot..... 3
- 157 About how many close friends does your child have?  
**(Circle one number)**  
 None ..... 1  
 One ..... 2  
 Two or three ..... 3  
 Four or more ..... 4
- 158 On average how many hours a day (Monday to Friday) does your child sit and watch TV?  
**(Circle one number)**  
 7 hours or more ..... 1  
 5 - less than 7 hours..... 2  
 3 - less than 5 hours..... 3  
 1 - less than 3 hours..... 4  
 Less than 1 hour ..... 5  
 Never watches TV ..... 6
- 159 On average how many hours a day (Saturday to Sunday) does your child sit and watch TV?  
**(Circle one number)**  
 7 hours or more ..... 1  
 5 - less than 7 hours..... 2  
 3 - less than 5 hours..... 3  
 1 - less than 3 hours..... 4  
 Less than 1 hour ..... 5  
 Never watches TV ..... 6

160 For writing is your child? **(Circle one number)**

- Left handed..... 1
- Right handed ..... 2
- Either handed..... 3

161 What is your child's year level (grade) at school?

\_\_\_\_\_ year level

162 How many primary schools did your child attend?

\_\_\_\_\_ number of schools

|  |  |
|--|--|
|  |  |
|--|--|

HAS YOUR CHILD EVER HAD CONTACT WITH ANY OF THE FOLLOWING?

**(Circle one number for each question 163-165)**

|                            | No | Yes |
|----------------------------|----|-----|
| 163 Guidance Officer       | 1  | 2   |
| 164 Children's Services    | 1  | 2   |
| 165 Police or Juvenile Aid | 1  | 2   |

166 Has your child ever been suspended from school for any reason?

**(Circle one number)**

- No..... 1
- Yes..... 2

167 How would you describe your child's current school performance overall?

**(Circle one number)**

- Below average ..... 1
- A bit below average..... 2
- Average ..... 3
- A bit above average..... 4
- Above average..... 5

**(Circle one number for each question 168-170)**

|                                                                                                        | No | Yes |
|--------------------------------------------------------------------------------------------------------|----|-----|
| 168 Has your child ever repeated a year at school?                                                     | 1  | 2   |
| 169 Has your child ever needed remedial help?                                                          | 1  | 2   |
| 170 Has your child ever attended a special education unit or special school for learning difficulties? | 1  | 2   |

171 How important is it to you for your child to do well at school?

**(Circle one number)**

- Not important ..... 1  
 Quite important ..... 2  
 Fairly important..... 3  
 Very important ..... 4

172 What would you most like your child to do after he/she finishes school?

**(Circle one number)**

- Get a job ..... 1  
 Trade/Apprenticeship ..... 2  
 College ..... 3  
 University ..... 4  
 Other (please specify)..... 5

NOW WE HAVE SOME QUESTIONS ABOUT YOURSELF.  
HAVE ANY OF THE FOLLOWING HAPPENED TO YOU IN THE **LAST SEVEN YEARS?**

**(Circle one number for each time this happened in questions 173-188)**

|     |                                                         | No | Yes - it happened |            |            |            |              |                          |
|-----|---------------------------------------------------------|----|-------------------|------------|------------|------------|--------------|--------------------------|
|     |                                                         |    | 1 yr. ago         | 2 yrs. ago | 3 yrs. ago | 4 yrs. ago | 5-7 yrs. ago |                          |
| 173 | Have you lost your job?                                 | 0  | 1                 | 2          | 3          | 4          | 5            | <input type="checkbox"/> |
| 174 | Has your partner lost his job?                          | 0  | 1                 | 2          | 3          | 4          | 5            | <input type="checkbox"/> |
| 175 | Have you or your partner had a problem with the police? | 0  | 1                 | 2          | 3          | 4          | 5            | <input type="checkbox"/> |
| 176 | Has anyone close to you died?                           | 0  | 1                 | 2          | 3          | 4          | 5            | <input type="checkbox"/> |
| 177 | Have you been divorced?                                 | 0  | 1                 | 2          | 3          | 4          | 5            | <input type="checkbox"/> |
| 178 | Have you and your partner separated?                    | 0  | 1                 | 2          | 3          | 4          | 5            | <input type="checkbox"/> |
| 179 | Have you changed partners?                              | 0  | 1                 | 2          | 3          | 4          | 5            | <input type="checkbox"/> |
| 180 | Have you had trouble finding somewhere to live?         | 0  | 1                 | 2          | 3          | 4          | 5            | <input type="checkbox"/> |

|     |                                                                     |    | Yes - it happened |               |               |               |                 |                                                   |
|-----|---------------------------------------------------------------------|----|-------------------|---------------|---------------|---------------|-----------------|---------------------------------------------------|
|     |                                                                     | No | 1 yr.<br>ago      | 2 yrs.<br>ago | 3 yrs.<br>ago | 4 yrs.<br>ago | 5-7 yrs.<br>ago |                                                   |
| 181 | Have you been treated for a mental or an emotional problem?         | 0  | 1                 | 2             | 3             | 4             | 5               | <input type="checkbox"/> <input type="checkbox"/> |
| 182 | Has your partner been treated for a mental or an emotional problem? | 0  | 1                 | 2             | 3             | 4             | 5               | <input type="checkbox"/> <input type="checkbox"/> |
| 183 | Have you had any serious financial problems?                        | 0  | 1                 | 2             | 3             | 4             | 5               | <input type="checkbox"/> <input type="checkbox"/> |
| 184 | Have you had a serious illness or injury?                           | 0  | 1                 | 2             | 3             | 4             | 5               | <input type="checkbox"/> <input type="checkbox"/> |
| 185 | Has your current partner had a serious illness or injury?           | 0  | 1                 | 2             | 3             | 4             | 5               | <input type="checkbox"/> <input type="checkbox"/> |
| 186 | Have you changed your address?                                      | 0  | 1                 | 2             | 3             | 4             | 5               | <input type="checkbox"/> <input type="checkbox"/> |
| 187 | Have you experienced violence in a relationship with a partner?     | 0  | 1                 | 2             | 3             | 4             | 5               | <input type="checkbox"/> <input type="checkbox"/> |
| 188 | Have you had some other major crisis or worry?                      | 0  | 1                 | 2             | 3             | 4             | 5               | <input type="checkbox"/> <input type="checkbox"/> |



189 In general, in the last year, do you think your health has been?

**(Circle one number)**

- Excellent..... 1  
 Good..... 2  
 Fair ..... 3  
 Poor ..... 4

190 How many times have you been to a doctor about your own health in the **last six months**?

\_\_\_\_\_ times (write 0 if never)

|  |  |
|--|--|
|  |  |
|--|--|

191 To what extent has your physical health or emotional problems interfered with your normal activities in the **last six months**?

**(Circle one number)**

- Not at all..... 1  
 Slightly ..... 2  
 Moderately ..... 3  
 Quite a bit..... 4  
 Extremely ..... 5

**HAVE YOU BEEN TO ANY OF THE FOLLOWING FOR A MENTAL OR EMOTIONAL PROBLEM IN THE LAST SEVEN YEARS?**

*(Circle one number for each question 192-195)*

|     |                                            | No | Yes |
|-----|--------------------------------------------|----|-----|
| 192 | A natural therapist                        | 1  | 2   |
| 193 | A general practitioner                     | 1  | 2   |
| 194 | A counsellor, psychologist or psychiatrist | 1  | 2   |
| 195 | Hospital for admission                     | 1  | 2   |

196 In the last week, how many cigarettes did you usually smoke per day?  
(Circle one number)

- 50 or more per day ..... 1
- 30 - 49 per day..... 2
- 20 - 29 per day..... 3
- 10 - 19 per day..... 4
- 1 - 9 per day..... 5
- None ..... 6

197 Do you smoke? (Circle one number)

- Nonsmoker ..... 1
- Inside the house..... 2
- Outside the house ..... 3
- Both ..... 4

198 Does your partner smoke? (Circle one number)

- Non-smoker ..... 1
- Inside the house..... 2
- Outside the house ..... 3
- Both ..... 4
- No partner..... 5

199 How often do you drink alcohol? (Circle one number)

- Daily ..... 1
- A few times a week ..... 2
- A few times a month ..... 3
- A few times a year..... 4
- Rarely ..... 5
- Never ..... 6

200 How much alcohol do you usually drink at those times?  
(Circle one number)

- Seven or more glasses ..... 1
- Five or six glasses ..... 2
- Three or four glasses ..... 3
- One or two glasses..... 4
- Less than one glass..... 5
- Never drink..... 6

NOW WE ARE INTERESTED IN HOW YOU HAVE BEEN FEELING RECENTLY.

*(Circle one number for each question 201-214)*

|     |                                                                                   | <b>All the time</b> | <b>Most of the time</b> | <b>Some of the time</b> | <b>Rarely</b> | <b>Never</b> |
|-----|-----------------------------------------------------------------------------------|---------------------|-------------------------|-------------------------|---------------|--------------|
| 201 | I have worried about every little thing                                           | 1                   | 2                       | 3                       | 4             | 5            |
| 202 | I have been so miserable that I have had difficulty sleeping                      | 1                   | 2                       | 3                       | 4             | 5            |
| 203 | I have been breathless or had a pounding of my heart                              | 1                   | 2                       | 3                       | 4             | 5            |
| 204 | I have been so worked up that I couldn't sit still                                | 1                   | 2                       | 3                       | 4             | 5            |
| 205 | I have been depressed without knowing why                                         | 1                   | 2                       | 3                       | 4             | 5            |
| 206 | I have gone to bed not caring if I never woke up                                  | 1                   | 2                       | 3                       | 4             | 5            |
| 207 | For no good reason I have had feelings of panic                                   | 1                   | 2                       | 3                       | 4             | 5            |
| 208 | I have been so low in spirit that I have sat up for ages doing absolutely nothing | 1                   | 2                       | 3                       | 4             | 5            |
| 209 | I have had a pain or tense feeling in my neck or head                             | 1                   | 2                       | 3                       | 4             | 5            |
| 210 | The future seems hopeless                                                         | 1                   | 2                       | 3                       | 4             | 5            |
| 211 | Worrying has kept me awake at night                                               | 1                   | 2                       | 3                       | 4             | 5            |
| 212 | I have lost interest in just about everything                                     | 1                   | 2                       | 3                       | 4             | 5            |
| 213 | I have been so anxious that I couldn't make up my mind about the simplest thing   | 1                   | 2                       | 3                       | 4             | 5            |
| 214 | I have been so depressed that I have thought of doing away with myself            | 1                   | 2                       | 3                       | 4             | 5            |

AT TIMES THERE ARE ARGUMENTS AND UPSETS IN EVERY RELATIONSHIP.  
HOW WELL DO THE FOLLOWING STATEMENTS DESCRIBE THE RELATIONSHIP  
BETWEEN YOU AND YOUR PARTNER?

(Circle one number for each question 215-223)

|     |                                                                                    | No partner | All the time | Most of the time | Some of the time | Rarely | Never |
|-----|------------------------------------------------------------------------------------|------------|--------------|------------------|------------------|--------|-------|
| 215 | In general, would you say that things between you and your partner are going well? | 1          | 2            | 3                | 4                | 5      | 6     |
| 216 | How often do you think about divorce, separation or terminating your relationship? | 1          | 2            | 3                | 4                | 5      | 6     |
| 217 | How often do you or your partner leave the house after a fight?                    | 1          | 2            | 3                | 4                | 5      | 6     |
| 218 | Do you find it easy to confide in your partner?                                    | 1          | 2            | 3                | 4                | 5      | 6     |
| 219 | Do you ever regret that you married (or are living together)?                      | 1          | 2            | 3                | 4                | 5      | 6     |
| 220 | How often do you and your partner quarrel?                                         | 1          | 2            | 3                | 4                | 5      | 6     |
| 221 | How often do you and your partner 'get on each other's nerves'?                    | 1          | 2            | 3                | 4                | 5      | 6     |
| 222 | When you have an argument with your partner, does the child know about it?         | 1          | 2            | 3                | 4                | 5      | 6     |
| 223 | If you have an argument with your partner, is the child involved?                  | 1          | 2            | 3                | 4                | 5      | 6     |

224 How satisfied are you with your relationship with your husband/partner?

(Circle one number)

- No husband/partner ..... 1  
 Very satisfied..... 2  
 Satisfied..... 3  
 Very dissatisfied..... 4  
 Dissatisfied..... 5

**NO MATTER HOW WELL A COUPLE GET ALONG, THERE ARE TIMES WHEN THEY DISAGREEE.**

If you had a disagreement, has your partner ever done any of the following in the **last year**?  
If no partner write 0 .....

**(Circle one number for each question 225-231)**

|     |                                                 | <b>Often</b> | <b>Sometimes</b> | <b>Never</b> |
|-----|-------------------------------------------------|--------------|------------------|--------------|
| 225 | Argued heatedly without yelling                 | 1            | 2                | 3            |
| 226 | Yelled at and/or insulted you                   | 1            | 2                | 3            |
| 227 | Sulked and/or refused to talk about the problem | 1            | 2                | 3            |
| 228 | Threw something at you                          | 1            | 2                | 3            |
| 229 | Pushed, grabbed or shoved you                   | 1            | 2                | 3            |
| 230 | Tried to hit you                                | 1            | 2                | 3            |
| 231 | Hit you                                         | 1            | 2                | 3            |

**DUE TO DISAGREEMENT WITH A PARTNER IN THE LAST SEVEN YEARS?**

If no partner write 0 .....

**(Circle one number for each question 232-234)**

|     |                                    | No | Yes |
|-----|------------------------------------|----|-----|
| 232 | Have you been physically hurt?     | 1  | 2   |
| 233 | Have you needed medical attention? | 1  | 2   |
| 234 | Have you called the police?        | 1  | 2   |

235 On the list below, could you circle the number closest to **your whole family's income** (gross) including spouse's income, child endowment, etc. If unsure, circle the number closest to the amount you think may be correct.

| <b>Per year</b>     |     | <b>Per week</b> |   |
|---------------------|-----|-----------------|---|
| \$0 - \$10,399      | ... | \$0 - \$199     | 1 |
| \$10,400 - \$15,599 | ... | \$200 - \$299   | 2 |
| \$15,600 - \$20,799 | ... | \$300 - \$399   | 3 |
| \$20,800 - \$25,999 | ... | \$400 - \$499   | 4 |
| \$26,000 - \$31,148 | ... | \$500 - \$599   | 5 |
| \$31,149 - \$36,349 | ... | \$600 - \$699   | 6 |
| \$36,350 or more    | ... | \$700 or more   | 7 |

236 What is your present marital status?

**(Circle one number)**

- Single (never married)..... 1  
 Living together ..... 2  
 Married ..... 3  
 Separated/divorced ..... 4  
 Widowed ..... 5  
 Other (please specify)..... 6

237 To which of the following groups does your partner belong?

**(Circle one number)**

- No partner..... 1  
 Australian Aboriginal ..... 2  
 Maori/Islander ..... 3  
 Asian..... 4  
 White ..... 5  
 Other (please specify)..... 6

238 Do you live with a partner?

**(Circle one number)**

- No ..... 1  
 Yes..... 2

239 How long has your present relationship lasted? .....

If not in a relationship write 0 .....

|  |  |
|--|--|
|  |  |
|--|--|

240 Is your present partner the father of this child?

**(Circle one number)**

- No ..... 1  
 Yes..... 2  
 No partner..... 3

241 What is **your** relationship to this child?

**(Circle one number)**

- Mother ..... 1  
 Father..... 2  
 Stepmother ..... 3  
 Stepfather ..... 4  
 Other (Please specify) ..... 5

242 Does this child live with you?

(Circle one number)

- All the time..... 1  
 Most of the time ..... 2  
 About half the time..... 3  
 Less than half the time ..... 4  
 Never ..... 5

243 How many years has this child lived with you?

\_\_\_\_\_ years

|  |  |
|--|--|
|  |  |
|--|--|

244 IF YOU ARE **NOT** THIS CHILD'S MOTHER, DOES THE CHILD LIVE WITH HIS/HER MOTHER?

(Circle one number)

- Not applicable, I am the mother ..... 1  
 All the time..... 2  
 Most of the time ..... 3  
 About half the time..... 4  
 Less than half the time ..... 5  
 Never ..... 6

245 How many years has this child lived with his/her mother?

\_\_\_\_\_ years

|  |  |
|--|--|
|  |  |
|--|--|

246 How many times has this child lived with someone else as the main care giver for over three months?

\_\_\_\_\_ times

|  |  |
|--|--|
|  |  |
|--|--|

WRITE THE NUMBER OF CHILDREN WHO USUALLY LIVE WITH YOU:

|                                                         | Number of Children |
|---------------------------------------------------------|--------------------|
| 247 <b>Your</b> children from your present relationship |                    |
| 248 <b>Your</b> children from a previous relationship   |                    |
| 249 Stepchildren eg your partner's children             |                    |
| 250 Other children eg foster children, niece, nephew    |                    |

251 Are you presently:

**(Circle one number)**

- |                                     |   |
|-------------------------------------|---|
| Fully employed.....                 | 1 |
| Self-employed .....                 | 2 |
| Employed part-time (temporary)..... | 3 |
| Unemployed .....                    | 4 |
| On pension.....                     | 5 |
| Student.....                        | 6 |
| Home duties.....                    | 7 |
| Other (please specify).....         | 8 |

252 Is your partner presently:

If no partner write 0 .....

**(Circle one number)**

- |                                     |   |
|-------------------------------------|---|
| Fully employed.....                 | 1 |
| Self-employed .....                 | 2 |
| Employed part-time (temporary)..... | 3 |
| Unemployed .....                    | 4 |
| On pension.....                     | 5 |
| Student.....                        | 6 |
| Home duties.....                    | 7 |
| Other (please specify).....         | 8 |

253 To which of the following occupational groups do you belong?

**(Circle one number)**

- |                                                                                                                 |   |
|-----------------------------------------------------------------------------------------------------------------|---|
| Home duties/not presently employed .....                                                                        | 1 |
| Labourers and related workers .....                                                                             | 2 |
| Tradesperson; Clerks Salespersons and Personal Service<br>Workers; Plant and Machine Operators and Drivers..... | 3 |
| Managers and Administrators; Professionals;<br>Para-Professionals .....                                         | 4 |



254 To which of the following occupational groups does your partner belong?

If no partner write 0 .....

**(Circle one number)**

- Home duties/not presently employed ..... 1  
 Labourers and related workers ..... 2  
 Tradesperson; Clerks; Salespersons and Personal Service  
 Workers; Plant and Machine Operators and Drivers..... 3  
 Managers and Administrators; Professionals;  
 Para-Professionals ..... 4

HOW MUCH ARE THE FOLLOWING A PROBLEM IN THE AREA WHERE YOU LIVE?

**(Circle one number for each question 255-263)**

|                                   | <b>Major<br/>problem</b> | <b>Moderate<br/>problem</b> | <b>Small<br/>problem</b> | <b>No<br/>problem</b> |
|-----------------------------------|--------------------------|-----------------------------|--------------------------|-----------------------|
| 255 Vandalism/graffiti            | 1                        | 2                           | 3                        | 4                     |
| 256 House burglaries              | 1                        | 2                           | 3                        | 4                     |
| 257 Car stealing                  | 1                        | 2                           | 3                        | 4                     |
| 258 Drug abuse                    | 1                        | 2                           | 3                        | 4                     |
| 259 Violence in the streets       | 1                        | 2                           | 3                        | 4                     |
| 260 Unemployment                  | 1                        | 2                           | 3                        | 4                     |
| 261 Noisy and/or reckless driving | 1                        | 2                           | 3                        | 4                     |
| 262 Alcohol abuse                 | 1                        | 2                           | 3                        | 4                     |
| 263 School truancy                | 1                        | 2                           | 3                        | 4                     |

NOW WE HAVE SOME QUESTIONS ABOUT **FOOD**.

264 How often does your family sit down to eat a meal together?

**(Circle one number)**

- At least once a day ..... 1
- A few times a week ..... 2
- About once a week ..... 3
- Less than once a week ..... 4

265 How important to you is it that your family eats together?

**(Circle one number)**

- Not really important ..... 1
- Quite important ..... 2
- Very important ..... 3

266 How often does your family go out to eat?

**(Circle one number)**

- About once a week ..... 1
- Once or twice a month ..... 2
- Several times a year ..... 3
- Rarely or never ..... 4

267 How often does your family get takeaway food?

**(Circle one number)**

- Once or more a week ..... 1
- A few times a month ..... 2
- Less than once a month ..... 3
- Rarely or never ..... 4

268 Who decides what food will be bought each week?

**(Circle one number)**

- I decide completely ..... 1
- I decide mostly ..... 2
- My partner and I decide equally ..... 3
- My partner decides mostly ..... 4
- My partner decides completely ..... 5

## HOW OFTEN DO YOU HAVE THE FOLLOWING?

(Circle one number for each question 269-277)

|                                       | Once or more a day | Most days | 2 or 3 times a week | Rarely or never |
|---------------------------------------|--------------------|-----------|---------------------|-----------------|
| 269 Sweets/lollies                    | 1                  | 2         | 3                   | 4               |
| 270 Fresh fruit                       | 1                  | 2         | 3                   | 4               |
| 271 Fast food (pizza, burgers, chips) | 1                  | 2         | 3                   | 4               |
| 272 Cooked vegetables                 | 1                  | 2         | 3                   | 4               |
| 273 Salad                             | 1                  | 2         | 3                   | 4               |
| 274 Red meat                          | 1                  | 2         | 3                   | 4               |
| 275 Soft drink/cordial                | 1                  | 2         | 3                   | 4               |
| 276 Fruit juice                       | 1                  | 2         | 3                   | 4               |
| 277 Cakes/biscuits                    | 1                  | 2         | 3                   | 4               |

## HOW IMPORTANT ARE THE FOLLOWING WHEN YOU CHOOSE FOOD?

(Circle one number for each question 278-284)

|                                     | Not Important | Quite Important | Very Important |
|-------------------------------------|---------------|-----------------|----------------|
| 278 Taste of the food               | 1             | 2               | 3              |
| 279 Whether my children will eat it | 1             | 2               | 3              |
| 280 Whether my partner will eat it  | 1             | 2               | 3              |
| 281 Whether it is easy to prepare   | 1             | 2               | 3              |
| 282 Whether it is healthy           | 1             | 2               | 3              |
| 283 Whether it is fattening         | 1             | 2               | 3              |
| 284 Whether it is expensive         | 1             | 2               | 3              |
