# Supplementary material for: Effect of maternal smoking in pregnancy and childhood on child and adolescent sleep outcomes to 21 years: a birth cohort study
Source: Springer Nature journal article supplement (doi:10.1186/s12887-019-1439-1), 2019-03-06
Supplement: MOESM6 [file 16529902]

MUSP Youth 14 Years

PLEASE WRITE YOUR DATE OF BIRTH ...../...../19.....

PHASE:

|   |   |
|---|---|
| 6 | 1 |
|---|---|

CODE: \_\_\_\_\_

DATE: \_\_\_\_\_

WHICH BEST DESCRIBES YOUR BEHAVIOUR IN THE **LAST SIX MONTHS?**

*(Circle one number for each question 1-112)*

|                                                    | Often | Sometimes | Rarely/<br>Never |
|----------------------------------------------------|-------|-----------|------------------|
| 1 I act too young for my age                       | 1     | 2         | 3                |
| 2 I have an allergy                                | 1     | 2         | 3                |
| 3 I argue a lot                                    | 1     | 2         | 3                |
| 4 I have asthma                                    | 1     | 2         | 3                |
| 5 I act like the opposite sex                      | 1     | 2         | 3                |
| 6 I like animals                                   | 1     | 2         | 3                |
| 7 I brag                                           | 1     | 2         | 3                |
| 8 I have trouble concentrating or paying attention | 1     | 2         | 3                |
| 9 I can't get my mind off certain thoughts         | 1     | 2         | 3                |
| 10 I have trouble sitting still                    | 1     | 2         | 3                |
| 11 I am too dependent on adults                    | 1     | 2         | 3                |
| 12 I feel lonely                                   | 1     | 2         | 3                |
| 13 I feel confused or in a fog                     | 1     | 2         | 3                |
| 14 I cry a lot                                     | 1     | 2         | 3                |

|                       |   |   |   |
|-----------------------|---|---|---|
| 15 I am pretty honest | 1 | 2 | 3 |
|-----------------------|---|---|---|

*(Circle one number)*

|    |                                                                          | <b>Often</b> | <b>Sometimes</b> | <b>Rarely/<br/>Never</b> |
|----|--------------------------------------------------------------------------|--------------|------------------|--------------------------|
| 16 | I am mean to others                                                      | 1            | 2                | 3                        |
| 17 | I day-dream a lot                                                        | 1            | 2                | 3                        |
| 18 | I deliberately try to hurt or kill myself                                | 1            | 2                | 3                        |
| 19 | I try to get a lot of attention                                          | 1            | 2                | 3                        |
| 20 | I destroy my own things                                                  | 1            | 2                | 3                        |
| 21 | I destroy things belonging to others                                     | 1            | 2                | 3                        |
| 22 | I disobey my parents                                                     | 1            | 2                | 3                        |
| 23 | I disobey at school                                                      | 1            | 2                | 3                        |
| 24 | I don't eat as well as I should                                          | 1            | 2                | 3                        |
| 25 | I don't get along with other kids                                        | 1            | 2                | 3                        |
| 26 | I don't feel guilty after doing something I shouldn't                    | 1            | 2                | 3                        |
| 27 | I am jealous of others                                                   | 1            | 2                | 3                        |
| 28 | I am willing to help others when they need help                          | 1            | 2                | 3                        |
| 29 | I am afraid of certain animals, situations, or places, other than school | 1            | 2                | 3                        |
| 30 | I am afraid of going to school                                           | 1            | 2                | 3                        |
| 31 | I am afraid I might think or do something bad                            | 1            | 2                | 3                        |
| 32 | I feel that I have to be perfect                                         | 1            | 2                | 3                        |

*(Circle one number)*

|    |                                                              | <b>Often</b> | <b>Sometimes</b> | <b>Rarely/<br/>Never</b> |
|----|--------------------------------------------------------------|--------------|------------------|--------------------------|
| 33 | I feel that no one loves me                                  | 1            | 2                | 3                        |
| 34 | I feel that others are out to get me                         | 1            | 2                | 3                        |
| 35 | I feel worthless or inferior                                 | 1            | 2                | 3                        |
| 36 | I accidentally get hurt a lot                                | 1            | 2                | 3                        |
| 37 | I get in many fights                                         | 1            | 2                | 3                        |
| 38 | I get teased a lot                                           | 1            | 2                | 3                        |
| 39 | I hang around with kids who get in trouble                   | 1            | 2                | 3                        |
| 40 | I hear sounds or voices that other people think aren't there | 1            | 2                | 3                        |
| 41 | I act without stopping to think                              | 1            | 2                | 3                        |
| 42 | I would rather be alone than with others                     | 1            | 2                | 3                        |
| 43 | I lie or cheat                                               | 1            | 2                | 3                        |
| 44 | I bite my fingernails                                        | 1            | 2                | 3                        |
| 45 | I am nervous or tense                                        | 1            | 2                | 3                        |
| 46 | Parts of my body twitch or make nervous movements            | 1            | 2                | 3                        |
| 47 | I have nightmares                                            | 1            | 2                | 3                        |
| 48 | I am not liked by other kids                                 | 1            | 2                | 3                        |
| 49 | I can do certain things better than most kids                | 1            | 2                | 3                        |

*(Circle one number)*

|    |                                                               | <b>Often</b> | <b>Sometimes</b> | <b>Rarely/<br/>Never</b> |
|----|---------------------------------------------------------------|--------------|------------------|--------------------------|
| 50 | I am fearful or anxious                                       | 1            | 2                | 3                        |
| 51 | I feel dizzy                                                  | 1            | 2                | 3                        |
| 52 | I feel too guilty                                             | 1            | 2                | 3                        |
| 53 | I eat too much                                                | 1            | 2                | 3                        |
| 54 | I feel overtired                                              | 1            | 2                | 3                        |
| 55 | I am overweight                                               | 1            | 2                | 3                        |
| 56 | I physically attack people                                    | 1            | 2                | 3                        |
| 57 | I pick my skin or other parts of my body                      | 1            | 2                | 3                        |
| 58 | I can be pretty friendly                                      | 1            | 2                | 3                        |
| 59 | I like to try new things                                      | 1            | 2                | 3                        |
| 60 | My school work is poor                                        | 1            | 2                | 3                        |
| 61 | I am poorly coordinated or clumsy                             | 1            | 2                | 3                        |
| 62 | I would rather be with older kids than with kids my own age   | 1            | 2                | 3                        |
| 63 | I would rather be with younger kids than with kids my own age | 1            | 2                | 3                        |
| 64 | I refuse to talk                                              | 1            | 2                | 3                        |
| 65 | I repeat certain actions over and over                        | 1            | 2                | 3                        |
| 66 | I run away from home                                          | 1            | 2                | 3                        |

*(Circle one number)*

|    |                                                     | <b>Often</b> | <b>Sometimes</b> | <b>Rarely/<br/>Never</b> |
|----|-----------------------------------------------------|--------------|------------------|--------------------------|
| 67 | I scream a lot                                      | 1            | 2                | 3                        |
| 68 | I am secretive or keep things to myself             | 1            | 2                | 3                        |
| 69 | I see things that other people think aren't there   | 1            | 2                | 3                        |
| 70 | I am self-conscious or easily embarrassed           | 1            | 2                | 3                        |
| 71 | I set fires                                         | 1            | 2                | 3                        |
| 72 | I can work well with my hands                       | 1            | 2                | 3                        |
| 73 | I show off or clown                                 | 1            | 2                | 3                        |
| 74 | I am shy                                            | 1            | 2                | 3                        |
| 75 | I sleep less than most kids                         | 1            | 2                | 3                        |
| 76 | I sleep more than most kids during day and/or night | 1            | 2                | 3                        |
| 77 | I have a good imagination                           | 1            | 2                | 3                        |
| 78 | I have a speech problem                             | 1            | 2                | 3                        |
| 79 | I stand up for my rights                            | 1            | 2                | 3                        |
| 80 | I steal at home                                     | 1            | 2                | 3                        |
| 81 | I steal from places other than home                 | 1            | 2                | 3                        |
| 82 | I store up things I don't need                      | 1            | 2                | 3                        |
| 83 | I do things other people think are strange          | 1            | 2                | 3                        |

*(Circle one number)*

|     |                                                           | <b>Often</b> | <b>Sometimes</b> | <b>Rarely/<br/>Never</b> |
|-----|-----------------------------------------------------------|--------------|------------------|--------------------------|
| 84  | I have thoughts that other people would think are strange | 1            | 2                | 3                        |
| 85  | I am stubborn                                             | 1            | 2                | 3                        |
| 86  | My moods or feelings change suddenly                      | 1            | 2                | 3                        |
| 87  | I enjoy being with other people                           | 1            | 2                | 3                        |
| 88  | I am suspicious                                           | 1            | 2                | 3                        |
| 89  | I swear or use dirty language                             | 1            | 2                | 3                        |
| 90  | I think about killing myself                              | 1            | 2                | 3                        |
| 91  | I like to make others laugh                               | 1            | 2                | 3                        |
| 92  | I talk too much                                           | 1            | 2                | 3                        |
| 93  | I tease others a lot                                      | 1            | 2                | 3                        |
| 94  | I have a hot temper                                       | 1            | 2                | 3                        |
| 95  | I think about sex too much                                | 1            | 2                | 3                        |
| 96  | I threaten to hurt people                                 | 1            | 2                | 3                        |
| 97  | I like to help others                                     | 1            | 2                | 3                        |
| 98  | I am too concerned about being neat and clean             | 1            | 2                | 3                        |
| 99  | I have trouble sleeping                                   | 1            | 2                | 3                        |
| 100 | I cut classes or skip school                              | 1            | 2                | 3                        |

*(Circle one number)*

|     |                                                | <b>Often</b> | <b>Sometimes</b> | <b>Rarely/<br/>Never</b> |
|-----|------------------------------------------------|--------------|------------------|--------------------------|
| 101 | I don't have much energy                       | 1            | 2                | 3                        |
| 102 | I am unhappy, sad or depressed                 | 1            | 2                | 3                        |
| 103 | I am louder than other kids                    | 1            | 2                | 3                        |
| 104 | I use alcohol or drugs for nonmedical purposes | 1            | 2                | 3                        |
| 105 | I try to be fair to others                     | 1            | 2                | 3                        |
| 106 | I enjoy a good joke                            | 1            | 2                | 3                        |
| 107 | I try to take life easy                        | 1            | 2                | 3                        |
| 108 | I try to help other people when I can          | 1            | 2                | 3                        |
| 109 | I wish I were of the opposite sex              | 1            | 2                | 3                        |
| 110 | I keep from getting involved with others       | 1            | 2                | 3                        |
| 111 | I worry a lot                                  | 1            | 2                | 3                        |
| 112 | I smoke cigarettes                             | 1            | 2                | 3                        |



How often have you had the following in the **last six months**?

(Circle one number for each question 113-119)

|                                    | Often | Sometimes | Rarely/<br>Never |
|------------------------------------|-------|-----------|------------------|
| 113 Aches or pains (not headaches) | 1     | 2         | 3                |
| 114 Headaches                      | 1     | 2         | 3                |
| 115 Nausea, feel sick              | 1     | 2         | 3                |
| 116 Problems with eyes             | 1     | 2         | 3                |
| 117 Rashes or other skin problems  | 1     | 2         | 3                |
| 118 Stomach aches or cramps        | 1     | 2         | 3                |
| 119 Vomiting, throwing up          | 1     | 2         | 3                |

120 On average how many **hours a day (Monday to Friday)** do you sit and watch TV?  
(Circle one number)

- 7 hours or more ..... 1  
 5 - less than 7 hours..... 2  
 3 - less than 5 hours..... 3  
 1 - less than 3 hours..... 4  
 Less than 1 hour ..... 5  
 Never watch TV ..... 6

121 On average how many **hours a day (Saturday to Sunday)** do you sit and watch TV?  
(Circle one number)

- 7 hours or more ..... 1  
 5 - less than 7 hours..... 2  
 3 - less than 5 hours..... 3  
 1 - less than 3 hours..... 4  
 Less than 1 hour ..... 5  
 Never watch TV ..... 6

122 In the **last week** how often did you smoke cigarettes?

*(Circle one number)*

- |                            |   |
|----------------------------|---|
| Every day .....            | 1 |
| Every few days .....       | 2 |
| Once or so only .....      | 3 |
| Did not smoke at all ..... | 4 |

123 In the last week how many cigarettes did you smoke?

*(Circle one number)*

- |                  |   |
|------------------|---|
| 50 or more ..... | 1 |
| 30-49 .....      | 2 |
| 20-29 .....      | 3 |
| 10-19 .....      | 4 |
| 1-9.....         | 5 |
| Nil smoked ..... | 6 |

124 How often do you drink alcohol?

*(Circle one number)*

- |                          |   |
|--------------------------|---|
| Daily .....              | 1 |
| A few times a week ..... | 2 |
| A few times a month..... | 3 |
| A few times a year ..... | 4 |
| Rarely .....             | 5 |
| Never .....              | 6 |

125 How much alcohol do you usually drink at those times?

*(Circle one number)*

- |                             |   |
|-----------------------------|---|
| Seven or more glasses ..... | 1 |
| Five or six glasses .....   | 2 |
| Three or four glasses ..... | 3 |
| One or two glasses .....    | 4 |
| Less than one glass .....   | 5 |
| Never drink . . .....       | 6 |

126 For writing, which hand do you use?

*(Circle one number)*

Left hand ..... 1  
 Right hand ..... 2  
 Either hand ..... 3

127 For most tasks which hand do you use?

*(Circle one number)*

Always right ..... 1  
 Usually right ..... 2  
 Always left ..... 3  
 Usually left ..... 4  
 Either hand ..... 5

128 In general, over the last year, do you think your health has been?

*(Circle one number)*

Excellent ..... 1  
 Good ..... 2  
 Fair ..... 3  
 Poor ..... 4

129 Do you have anyone you can talk to about your problems?

*(Circle one number)*

No ..... 1  
 Yes ..... 2

130 How often did you exercise or play sports in the last week?

*(Circle one number)*

Not at all ..... 1  
 1 day ..... 2  
 2 or 3 days ..... 3  
 4 or 5 days ..... 4  
 6 or 7 days ..... 5

131 How are you doing at school in English?

*(Circle one number)*

- Below average..... 1  
 A bit below average ..... 2  
 Average ..... 3  
 A bit above average..... 4  
 Above average..... 5

132 How are you doing at school in Maths?

*(Circle one number)*

- Below average..... 1  
 A bit below average ..... 2  
 Average ..... 3  
 A bit above average..... 4  
 Above average..... 5

133 How are you doing at school in Science?

*(Circle one number)*

- Below average..... 1  
 A bit below average ..... 2  
 Average ..... 3  
 A bit above average..... 4  
 Above average..... 5

134 How are you doing at school overall?

*(Circle one number)*

- Below average..... 1  
 A bit below average ..... 2  
 Average ..... 3  
 A bit above average..... 4  
 Above average..... 5

135 How important do your friends think it is to work hard at school?

*(Circle one number)*

- Not important ..... 1  
 A bit important ..... 2  
 Fairly important ..... 3  
 Very important ..... 4

136 Is the amount of effort you put into your school work?

*(Circle one number)*

- Below average ..... 1  
 A bit below average ..... 2  
 Average ..... 3  
 A bit above average ..... 4  
 Above average ..... 5

137 How important do you think it is for you to do well at school?

*(Circle one number)*

- Not important ..... 1  
 A bit important ..... 2  
 Fairly important ..... 3  
 Very important ..... 4

138 How important does your mother think it is for you to work hard at school?

*(Circle one number)*

- No mother ..... 1  
 Not important ..... 2  
 A bit important ..... 3  
 Fairly important ..... 4  
 Very important ..... 5

- 139 How important does your father think it is for you to work hard at school?

*(Circle one number)*

- No father ..... 1  
Not important ..... 2  
A bit important ..... 3  
Fairly important ..... 4  
Very important ..... 5

- 140 What would you like to do when you finish school?

*(Circle one number)*

- Get a job ..... 1  
Trade/apprenticeship ..... 2  
College ..... 3  
University ..... 4  
Other (please specify) ..... 5

- 141 What would you like to be when you leave school (eg plumber, hairdresser)?

---

---

---
